# Supplementary material for: Estimated Incidence of Hospitalizations and Deaths Attributable to Respiratory Syncytial Virus Infections Among Adults in Germany Between 2015 and 2019
Source: PubMed Central journal article supplement — Infect Dis Ther. 2024 Mar 23;13(4):845–60. doi: 10.1007/s40121-024-00951-0 (PMC11058748; doi:10.1007/s40121-024-00951-0), 2024-03-23

**Title:****Estimated incidence of hospitalizations and deaths attributable to Respiratory Syncytial Virus infections among adults in Germany between 2015 and 2019****Author details:**

Aleksandra Polkowska-Kramek<sup>1</sup>, Elizabeth Begier<sup>2</sup>, Robin Bruyndonckx<sup>1</sup>, Caihua Liang<sup>3</sup>, Caroline Beese<sup>4</sup>, Gordon Brestrich<sup>4</sup>, Thao Mai Phuong Tran<sup>1</sup>, Charles Nuttens<sup>5</sup>, Maribel Casas<sup>1</sup>, Lea Johanna Bayer<sup>4</sup>, Bennet Huebbe<sup>4</sup>, Worku Biyadgie Ewnetu<sup>1</sup>, Juan Luis Ramirez Agudelo<sup>1</sup>, Bradford D. Gessner<sup>3</sup>, Christof von Eiff<sup>4</sup>, Gernot Rohde<sup>6</sup>

**Affiliations:**

<sup>1</sup> P95 Pharmacovigilance and Epidemiology Services, Leuven, Belgium.

<sup>2</sup>Pfizer Inc - Dublin (Ireland)

<sup>3</sup>Pfizer Inc-New York (USA)

<sup>4</sup>Pfizer Pharma GmbH - Berlin (Germany)

<sup>5</sup>Pfizer Inc - Paris (France);

<sup>6</sup> Goethe University Frankfurt, University Hospital, Medical Clinic I, Department of Respiratory Medicine, Frankfurt/Main, Germany

**Corresponding author:**

Caihua Liang

Email: [caihua.liang@pfizer.com](mailto:caihua.liang@pfizer.com)

Phone: 1-716-429-5598

Address: 66 Hudson Blvd E, New York, NY 10001

Supplementary table 1. Definition of conditions classifying individuals as high risk patient

| Nominating condition    | ICD-10-GM     |                                                                                                                                                                                                                                                                                                                           |
|-------------------------|---------------|---------------------------------------------------------------------------------------------------------------------------------------------------------------------------------------------------------------------------------------------------------------------------------------------------------------------------|
|                         | Code          | Nomenclature                                                                                                                                                                                                                                                                                                              |
| Chronic cardiac disease | I05           | Rheumatic mitral valve diseases                                                                                                                                                                                                                                                                                           |
|                         | I06           | Rheumatic aortic valve diseases                                                                                                                                                                                                                                                                                           |
|                         | I08.0         | Rheumatic disorders of both mitral and aortic valves                                                                                                                                                                                                                                                                      |
|                         | I09           | Other rheumatic heart diseases                                                                                                                                                                                                                                                                                            |
|                         | I11           | Hypertensive heart disease                                                                                                                                                                                                                                                                                                |
|                         | I13           | Hypertensive heart and chronic kidney disease                                                                                                                                                                                                                                                                             |
|                         | I21-I23       | I21: ST elevation (STEMI) and non-ST elevation (NSTEMI) myocardial infarction<br>I22: Subsequent ST elevation (STEMI) and non-ST elevation (NSTEMI) myocardial infarction<br>I23: Certain current complications following ST elevation (STEMI) and non-ST elevation (NSTEMI) myocardial infarction (within 28 day period) |
|                         | I24           | Other acute ischemic heart diseases                                                                                                                                                                                                                                                                                       |
|                         | I25.2         | Old myocardial infarction                                                                                                                                                                                                                                                                                                 |
|                         | I20           | Angina pectoris                                                                                                                                                                                                                                                                                                           |
|                         | I25.8         | Other forms of chronic ischemic heart disease                                                                                                                                                                                                                                                                             |
|                         | I27           | Other pulmonary heart diseases                                                                                                                                                                                                                                                                                            |
|                         | Z95.9         | Presence of cardiac and vascular implant and graft, unspecified                                                                                                                                                                                                                                                           |
|                         | Z95.1         | Presence of aortocoronary bypass graft                                                                                                                                                                                                                                                                                    |
|                         | I34-I39       | I34: Nonrheumatic mitral valve disorders<br>I35: Nonrheumatic aortic valve disorders<br>I36: Nonrheumatic tricuspid valve disorders<br>I37: Nonrheumatic pulmonary valve disorders<br>I38: Endocarditis, valve unspecified<br>I39: Endocarditis and heart valve disorders in diseases classified elsewhere                |
|                         | I42           | Cardiomyopathy                                                                                                                                                                                                                                                                                                            |
|                         | I45           | Other conduction disorders                                                                                                                                                                                                                                                                                                |
|                         | I49           | Other cardiac arrhythmias                                                                                                                                                                                                                                                                                                 |
| I50                     | Heart failure |                                                                                                                                                                                                                                                                                                                           |

| Nominating condition         | ICD-10-GM                                                                                  |                                                                                |
|------------------------------|--------------------------------------------------------------------------------------------|--------------------------------------------------------------------------------|
|                              | Code                                                                                       | Nomenclature                                                                   |
|                              | I51                                                                                        | Complications and ill-defined descriptions of heart disease                    |
|                              | I70                                                                                        | Atherosclerosis                                                                |
|                              | Q21                                                                                        | Congenital malformations of cardiac septa                                      |
|                              | Q24                                                                                        | Other congenital malformations of heart                                        |
|                              | Q28                                                                                        | Other congenital malformations of circulatory system                           |
|                              | I46                                                                                        | Cardiac arrest                                                                 |
|                              | I97.1                                                                                      | Other postprocedural cardiac functional disturbances                           |
| Chronic respiratory diseases | J40                                                                                        | Bronchitis, not specified as acute or chronic                                  |
|                              | J41<br>J42                                                                                 | Simple and mucopurulent chronic bronchitis<br>Unspecified chronic bronchitis   |
|                              | J43                                                                                        | Emphysema                                                                      |
|                              | J45                                                                                        | Asthma                                                                         |
|                              | J47                                                                                        | Bronchiectasis                                                                 |
|                              | J44                                                                                        | Other chronic obstructive pulmonary disease                                    |
|                              | J60                                                                                        | Coal workers' pneumoconiosis                                                   |
|                              | J61                                                                                        | Pneumoconiosis due to asbestos and other mineral fibers                        |
|                              | J62                                                                                        | Pneumoconiosis due to dust containing silica                                   |
|                              | J63                                                                                        | Pneumoconiosis due to other inorganic dust                                     |
|                              | J64                                                                                        | Pneumoconiosis, unspecified                                                    |
|                              | J68                                                                                        | Respiratory conditions due to inhalation of chemicals, gases, fumes and vapors |
|                              | J69                                                                                        | Pneumonitis due to solids and liquids                                          |
|                              | J70                                                                                        | Respiratory conditions due to other external agents                            |
|                              | E84                                                                                        | Cystic fibrosis                                                                |
|                              | J85                                                                                        | Abscess of lung and mediastinum                                                |
|                              | J81 s                                                                                      | Pulmonary edema                                                                |
| J84.1<br>J84.8               | Other interstitial pulmonary disease with fibrosis<br>Other interstitial pulmonary disease |                                                                                |

| Nominating condition   | ICD-10-GM |                                                                   |
|------------------------|-----------|-------------------------------------------------------------------|
|                        | Code      | Nomenclature                                                      |
|                        | J84.0     | Alveolar and parieto-alveolar conditions                          |
|                        | J98.4     | Other disorders of lung                                           |
| Diabetes mellitus      | E10-E14   | Diabetes mellitus                                                 |
|                        | E16       | Other disorders of pancreatic internal secretion                  |
|                        | G63.2     | Diabetic polyneuropathy                                           |
|                        | H36.0     | Diabetic retinopathy                                              |
|                        | H35.0     | Retinopathies of the ocular fundus and changes in retinal vessels |
|                        | H28.0     | Diabetic cataract                                                 |
|                        | O24       | Diabetes mellitus in pregnancy, childbirth, and the puerperium    |
| Chronic liver disease  | K70-K77   | Diseases of liver                                                 |
|                        | Q44.6     | Cystic disease of liver                                           |
| Chronic kidney disease | I12       | Hypertensive chronic kidney disease                               |
|                        | N00       | Acute nephritic syndrome                                          |
|                        | N04       | Nephrotic syndrome                                                |
|                        | N03       | Chronic nephritic syndrome                                        |
|                        | N05       | Unspecified nephritic syndrome                                    |
|                        | N17       | Acute kidney failure                                              |
|                        | N18       | Chronic kidney disease (ckd)                                      |
|                        | N19       | Unspecified kidney failure                                        |
|                        | N26       | Renal sclerosis, unspecified                                      |
|                        | N25       | Disorders resulting from impaired renal tubular function          |
|                        | N27       | Small kidney of unknown cause                                     |
|                        | N13.3     | Unspecified hydronephrosis                                        |
|                        | N28.8     | Other specified disorders of kidney and ureter                    |
|                        | Z94.0     | Kidney transplant status                                          |
|                        | Z49       | Encounter for care involving renal dialysis                       |
| Immunosuppression      | B20-B24   | Human immunodeficiency virus [HIV] disease                        |
|                        | D71       | Functional disorders of polymorphonuclear neutrophils             |
|                        | D72.0     | Genetic anomalies of leukocytes                                   |

| Nominating condition | ICD-10-GM                       |                                                                                                                                                                                              |
|----------------------|---------------------------------|----------------------------------------------------------------------------------------------------------------------------------------------------------------------------------------------|
|                      | Code                            | Nomenclature                                                                                                                                                                                 |
|                      | M30                             | Polyarteritis nodosa and related conditions                                                                                                                                                  |
|                      | M32                             | Systemic lupus erythematosus (SLE)                                                                                                                                                           |
|                      | M35.0<br>H19.3                  | Sjögren syndrome, unspecified<br>Sjögren syndrome with keratoconjunctivitis                                                                                                                  |
|                      | M33.2                           | Polymyositis, organ involvement unspecified                                                                                                                                                  |
|                      | M06                             | Other rheumatoid arthritis                                                                                                                                                                   |
|                      | Z21                             | Asymptomatic human immunodeficiency virus [HIV] infection status                                                                                                                             |
|                      | Z94.0                           | Kidney transplant status                                                                                                                                                                     |
|                      | Z95.3                           | Presence of xenogenic heart valve                                                                                                                                                            |
|                      | Z94                             | Transplanted organ                                                                                                                                                                           |
|                      | Z51.0                           | Encounter for antineoplastic radiation therapy                                                                                                                                               |
|                      | Z51.1                           | Chemotherapy session due to malignant neoplasm                                                                                                                                               |
|                      | D37-D48                         | Neoplasms of uncertain or unknown behaviour                                                                                                                                                  |
|                      | C00-C14                         | Malignant neoplasms of lip, oral cavity and pharynx                                                                                                                                          |
|                      | C15-C26                         | Malignant neoplasms of digestive organs                                                                                                                                                      |
|                      | C30-C39                         | Malignant neoplasms of respiratory and intrathoracic organs                                                                                                                                  |
|                      | C40-C41 C43-C44 C45-C49 C50-C50 | Malignant neoplasms of bone and articular cartilage<br>Melanoma and other malignant neoplasms of skin<br>Malignant neoplasms of mesothelial and soft tissue<br>Malignant neoplasms of breast |
|                      | C51-C58 C60-63<br>C64-C68       | Malignant neoplasms of female genital organs<br>Malignant neoplasms of male genital organs<br>Malignant neoplasms of urinary tract                                                           |
|                      | C69-C72                         | Malignant neoplasms of eye, brain and other parts of central nervous system                                                                                                                  |
|                      | C73-C75                         | Malignant neoplasms of thyroid and other endocrine glands                                                                                                                                    |
|                      | C76-C80                         | Malignant neoplasms of ill-defined, other secondary and                                                                                                                                      |

| Nominating condition   | ICD-10-GM                             |                                                                                                                                                                                                                                                                                                                 |
|------------------------|---------------------------------------|-----------------------------------------------------------------------------------------------------------------------------------------------------------------------------------------------------------------------------------------------------------------------------------------------------------------|
|                        | Code                                  | Nomenclature                                                                                                                                                                                                                                                                                                    |
|                        |                                       | unspecified sites                                                                                                                                                                                                                                                                                               |
|                        | C81-C88                               | C81 Hodgkin lymphoma, C82 Follicular lymphoma, C83 Non-follicular lymphoma, C84 Mature T/NK-cell lymphomas, C85 Other specified and unspecified types of non-Hodgkin lymphoma, C86 Other specified types of T/NK-cell lymphoma, C88 Malignant immunoproliferative diseases and certain other B-cell lymphomas,  |
|                        | C90.1<br>C91-C95                      | C90.1 Plasma cell leukemia<br>C91 Lymphoid leukemia, C92 Myeloid leukemia, C93 Monocytic leukemia, C94 Other leukemias of specified cell type, C95 Leukemia of unspecified cell type                                                                                                                            |
|                        | D80-D84 and D89                       | D80 Immunodeficiency with predominantly antibody defects<br>D81 Combined immunodeficiencies<br>D82 Immunodeficiency associated with other major defects<br>D83 Common variable immunodeficiency<br>D84 Other immunodeficiencies<br>D89 Other disorders involving the immune mechanism, not elsewhere classified |
|                        | T86                                   | Complications of transplanted organs and tissue                                                                                                                                                                                                                                                                 |
|                        | M32                                   | Systemic lupus erythematosus                                                                                                                                                                                                                                                                                    |
|                        | M05; M06; M08                         | Rheumatoid arthritis                                                                                                                                                                                                                                                                                            |
|                        | L40                                   | Psoriasis                                                                                                                                                                                                                                                                                                       |
|                        | M07                                   | Enteropathic arthropathies                                                                                                                                                                                                                                                                                      |
|                        | M31.5<br>M31.6                        | Giant cell arteritis with polymyalgia rheumatica<br>Other giant cell arteritis                                                                                                                                                                                                                                  |
| Neurological disorders | Q00-Q07                               | Congenital malformations of the nervous system                                                                                                                                                                                                                                                                  |
|                        | G10-G14; G20-G26; G30-G32;<br>G35-G37 | Inflammatory diseases of the central nervous system, Systemic atrophies primarily affecting the central nervous system,                                                                                                                                                                                         |
|                        | G45-G46                               | G45 Transient cerebral ischemic attacks and related syndromes, G46 Vascular syndromes of brain in cerebrovascular diseases                                                                                                                                                                                      |
|                        | G70-G99                               | G70-G73 Diseases of myoneural junction and muscle, G80-G83                                                                                                                                                                                                                                                      |

| Nominating condition | ICD-10-GM |                                                                                             |
|----------------------|-----------|---------------------------------------------------------------------------------------------|
|                      | Code      | Nomenclature                                                                                |
|                      |           | Cerebral palsy and other paralytic syndromes, G90-G99 Other disorders of the nervous system |

*ICD: International Classification of Diseases.*

Supplementary table 2. Parameter estimates for the final Quasi-poisson regression models for respiratory hospitalizations in patients without risk factors.

| Parameter    | 18-44 years |                | 45-59 years |                | 60-74 years |                | ≥75 years |                |
|--------------|-------------|----------------|-------------|----------------|-------------|----------------|-----------|----------------|
|              | Estimate    | Standard error | Estimate    | Standard error | Estimate    | Standard error | Estimate  | Standard error |
| $\beta_0$    | 96.719      | 2.325          | 50.281      | 1.411          | 21.264      | 0.821          | 11.658    | 0.827          |
| $\beta_1$    | -0.031      | 0.013          | -0.007      | 0.008          | 0.026       | 0.005          | 0.027     | 0.014          |
| $\beta_2$    | NA          | NA             | NA          | NA             | NA          | NA             | 0.000     | 0.000          |
| $\beta_3$    | NA          | NA             | NA          | NA             | NA          | NA             | NA        | NA             |
| $\beta_4$    | NA          | NA             | NA          | NA             | NA          | NA             | NA        | NA             |
| $\beta_5$    | 4.524       | 2.196          | 0.867       | 1.409          | 1.671       | 0.878          | 0.669     | 0.570          |
| $\beta_6$    | 7.861       | 1.615          | 4.528       | 0.944          | 0.701       | 0.538          | 1.511     | 0.422          |
| $\beta_7$    | -0.799      | 1.615          | 0.070       | 0.959          | 0.737       | 0.549          | 0.145     | 0.414          |
| $\beta_8$    | -5.664      | 1.462          | -0.649      | 0.947          | -0.307      | 0.595          | -0.168    | 0.372          |
| $\beta_9$    | 0.165       | 0.054          | 0.133       | 0.033          | 0.094       | 0.020          | 0.046     | 0.015          |
| $\beta_{10}$ | 0.084       | 0.085          | 0.072       | 0.052          | 0.044       | 0.031          | 0.070     | 0.024          |

Parameter  $\beta_0$  is the coefficient associated with the baseline number of events,  $\beta_1$  to  $\beta_4$  are coefficients associated with the aperiodic time trend,  $\beta_5$  to  $\beta_8$  are coefficients associated with the periodic time trend, and  $\beta_{(8+l)}$  are coefficients associated with appropriately lagged activity of pathogen  $l$  with  $l = 1, \dots, L$  where  $L = 2$  (RSV and influenza). In this table,  $\beta_9$  represents the coefficient associated with influenza and  $\beta_{10}$  represents the coefficient associated with RSV. Note that this does not necessarily reflect the order of the inclusion of the respective parameters into the models.



Supplementary table 3. Parameter estimates for the final Quasi-poisson regression models for respiratory hospitalizations in patients with risk factors.

| Parameter    | 18-44 years |                | 45-59 years |                | 60-74 years |                | ≥75 years |                |
|--------------|-------------|----------------|-------------|----------------|-------------|----------------|-----------|----------------|
|              | Estimate    | Standard error | Estimate    | Standard error | Estimate    | Standard error | Estimate  | Standard error |
| $\beta_0$    | 111.266     | 2.590          | 224.215     | 4.659          | 345.516     | 6.048          | 372.397   | 8.309          |
| $\beta_1$    | -0.032      | 0.015          | 0.075       | 0.027          | 0.375       | 0.036          | 0.752     | 0.138          |
| $\beta_2$    | NA          | NA             | NA          | NA             | NA          | NA             | -0.001    | 0.000          |
| $\beta_3$    | NA          | NA             | NA          | NA             | NA          | NA             | NA        | NA             |
| $\beta_4$    | NA          | NA             | NA          | NA             | NA          | NA             | NA        | NA             |
| $\beta_5$    | -0.051      | 2.695          | 4.902       | 4.653          | 13.480      | 6.093          | 31.633    | 5.642          |
| $\beta_6$    | 4.809       | 1.643          | 10.253      | 3.145          | 10.719      | 4.149          | 22.234    | 4.249          |
| $\beta_7$    | -2.247      | 1.701          | -1.329      | 3.195          | 1.340       | 4.189          | 7.674     | 4.164          |
| $\beta_8$    | -3.539      | 1.853          | -4.447      | 3.165          | -2.893      | 4.144          | -2.003    | 3.758          |
| $\beta_9$    | 0.156       | 0.056          | 0.370       | 0.105          | 0.757       | 0.142          | 1.109     | 0.147          |
| $\beta_{10}$ | 0.168       | 0.090          | 0.308       | 0.168          | 0.622       | 0.223          | 1.020     | 0.226          |

Parameter  $\beta_0$  is the coefficient associated with the baseline number of events,  $\beta_1$  to  $\beta_4$  are coefficients associated with the aperiodic time trend,  $\beta_5$  to  $\beta_8$  are coefficients associated with the periodic time trend, and  $\beta_{(l+1)}$  are coefficients associated with appropriately lagged activity of pathogen  $l$  with  $l = 1, \dots, L$  where  $L = 2$  (RSV and influenza). In this table,  $\beta_9$  represents the coefficient associated with influenza and  $\beta_{10}$  represents the coefficient associated with RSV. Note that this does not necessarily reflect the order of the inclusion of the respective parameters into the models.

Supplementary figure 1. Weekly estimated versus observed all respiratory hospitalized cases in people aged 18-44 (A), 45-59 (B), 60-74 (C), and  $\geq 75$  years (D) without risk factors and in people aged 18-44 (E), 45-59 (F), 60-74 (G), and  $\geq 75$  years (H) with risk factors

A

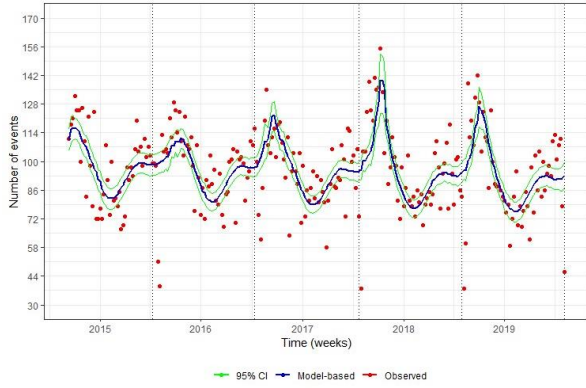

B

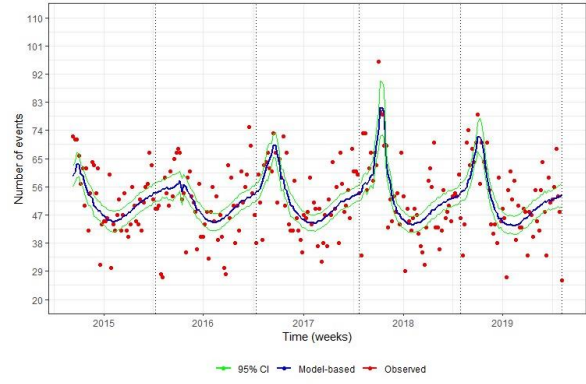

C

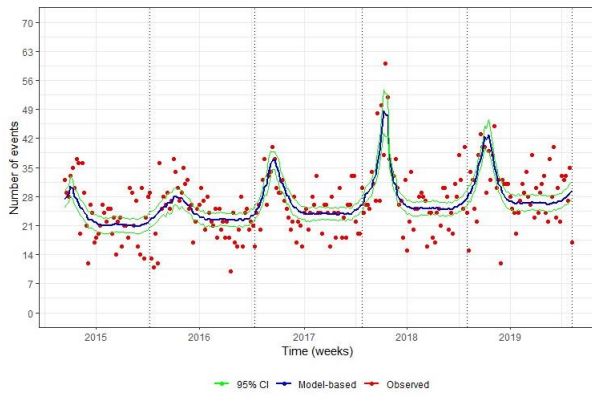

D

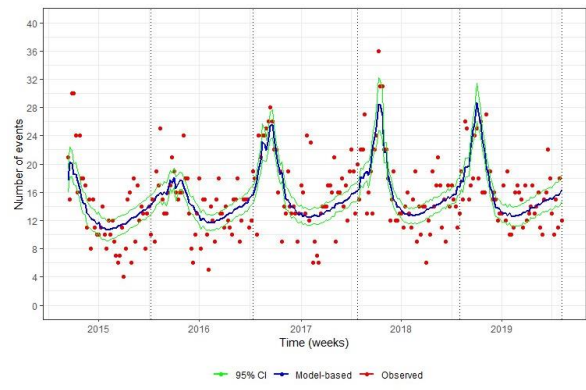

E

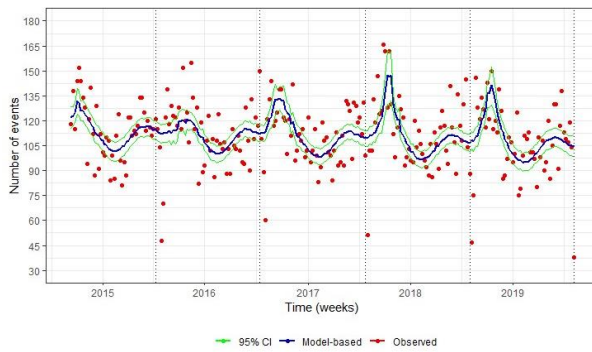

F

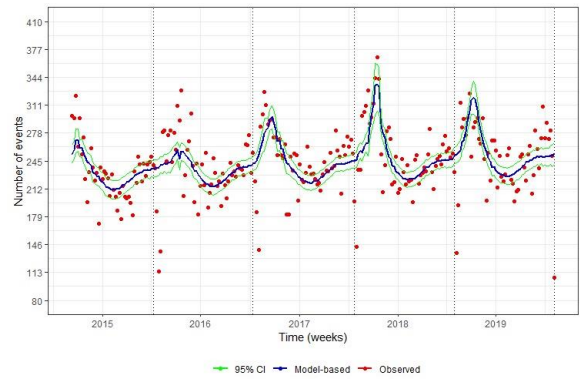

G



H



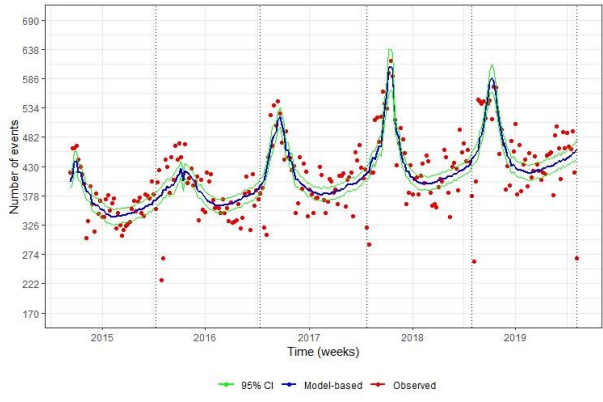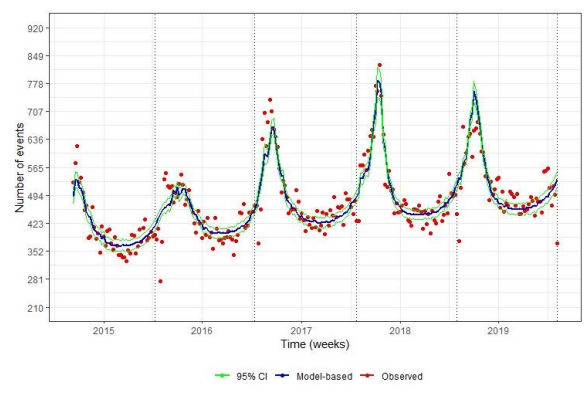

Supplementary figure 2. Weekly estimated versus observed all cardiovascular hospitalized cases in people aged 18-44 (A), 45-59 (B), 60-74 (C), and  $\geq 75$  years (D) without risk factors and in people aged 18-44 (E), 45-59 (F), 60-74 (G), and  $\geq 75$  years (H) with risk factors

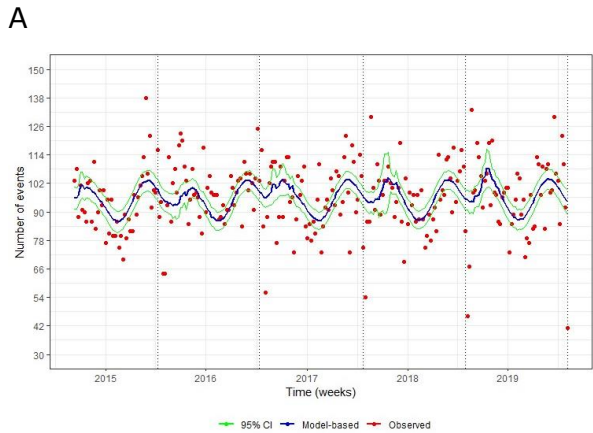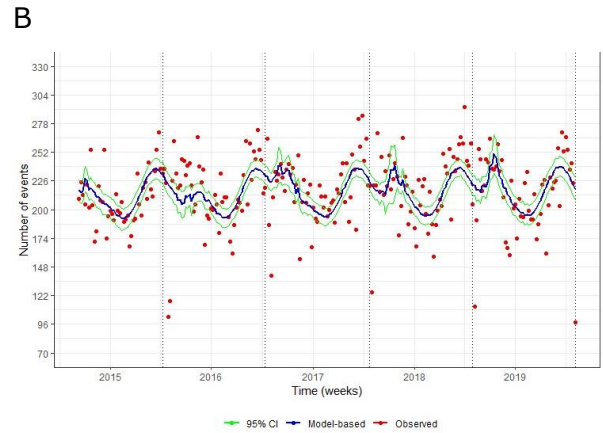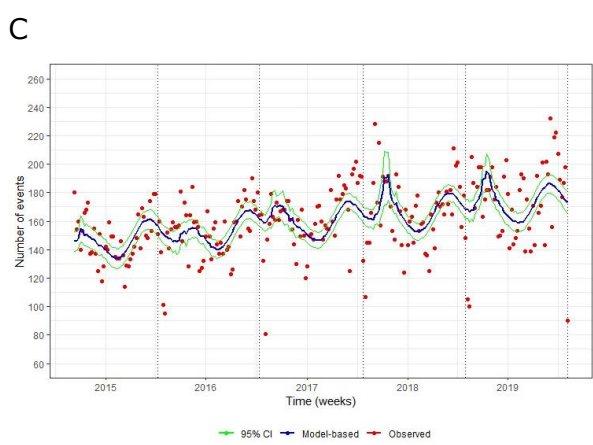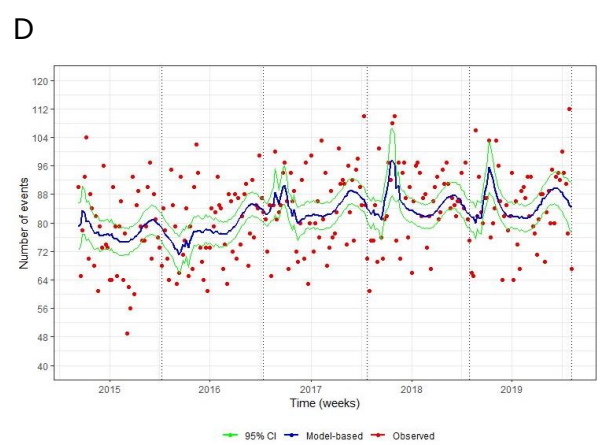

**E**

**F**

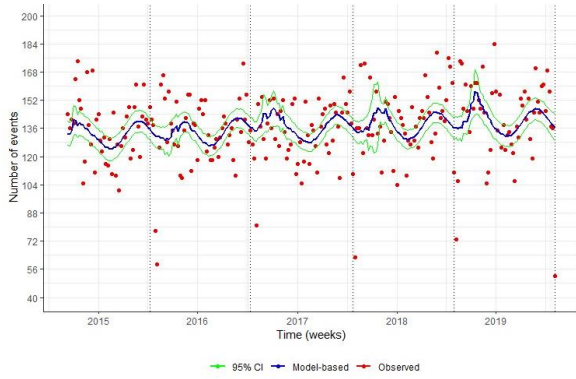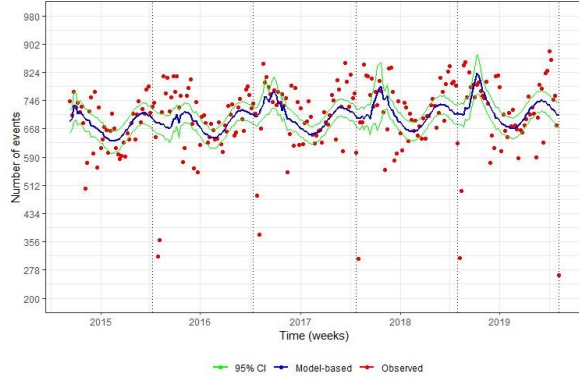

G

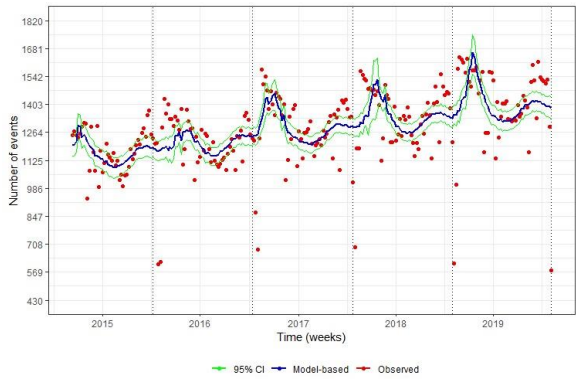

H

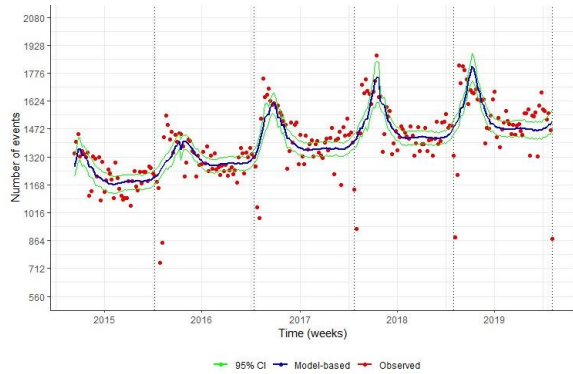

Supplementary figure 3. Weekly estimated versus observed all cardiorespiratory hospitalized cases in people aged 18-44 (A), 45-59 (B), 60-74 (C), and  $\geq 75$  years (D) without risk factors and in people aged 18-44 (E), 45-59 (F), 60-74 (G), and  $\geq 75$  years (H) with risk factors

A

B

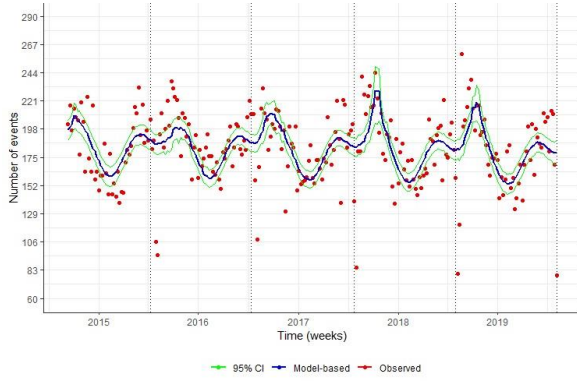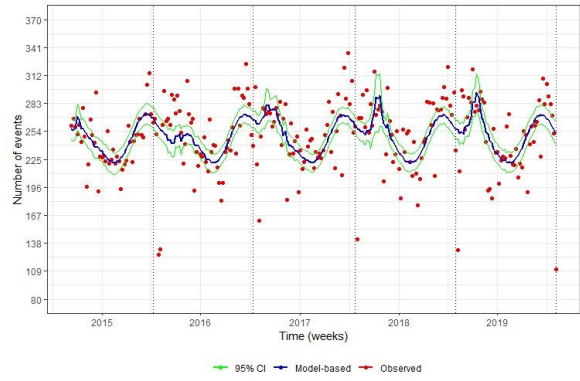

C

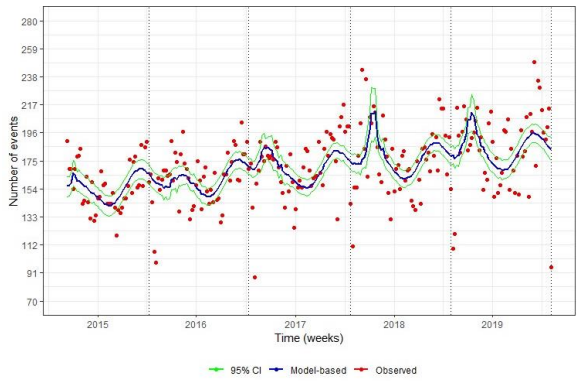

D

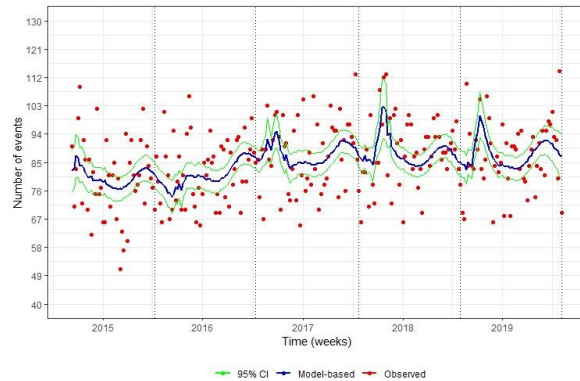

E

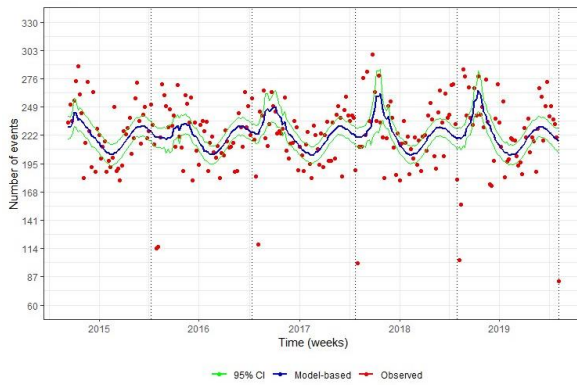

F

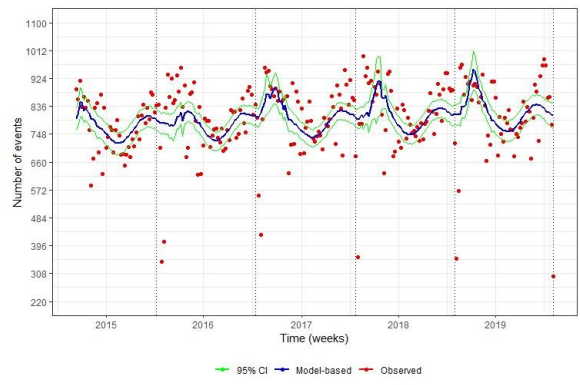

G

H



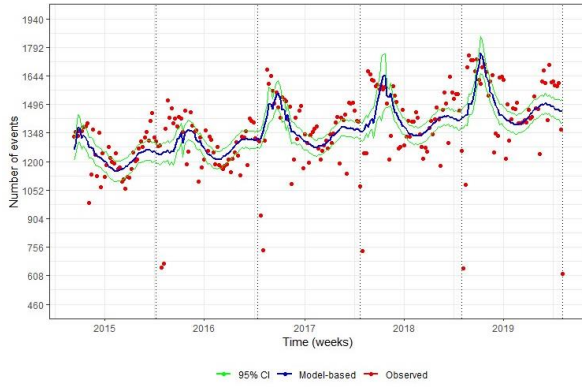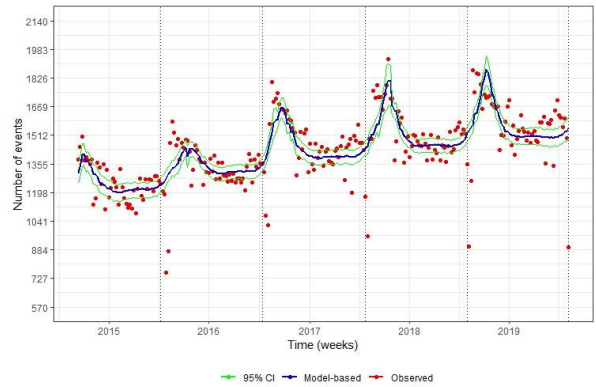

Supplementary figure 4. Weekly estimated versus observed deaths within 28-day of cardiorespiratory hospitalization in people aged 18-44 (A), 45-59 (B), 60-74 (C) and  $\geq 75$  years (D) with risk factors, 2015-2019, Germany

A

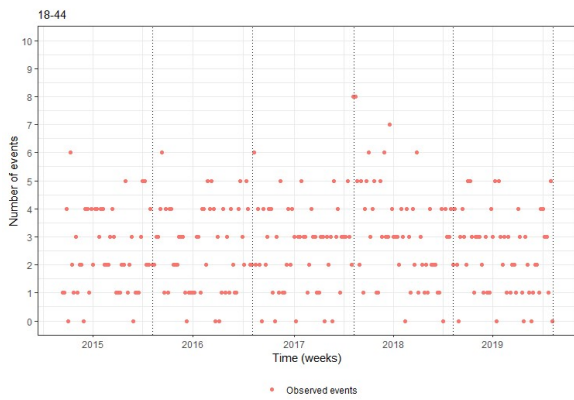

B

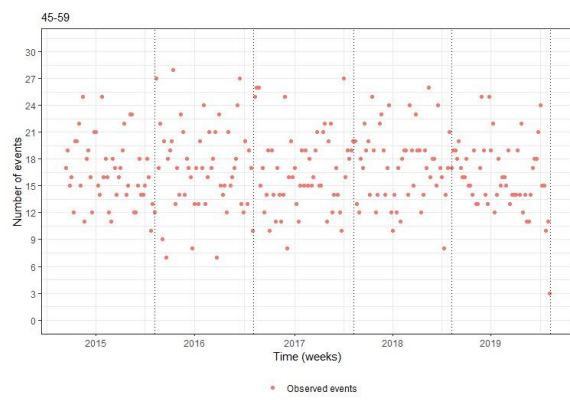

C

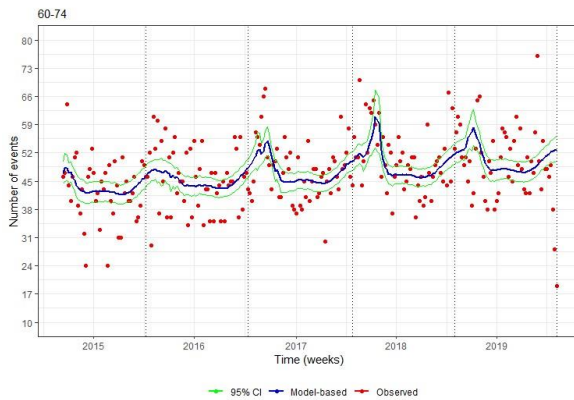

D

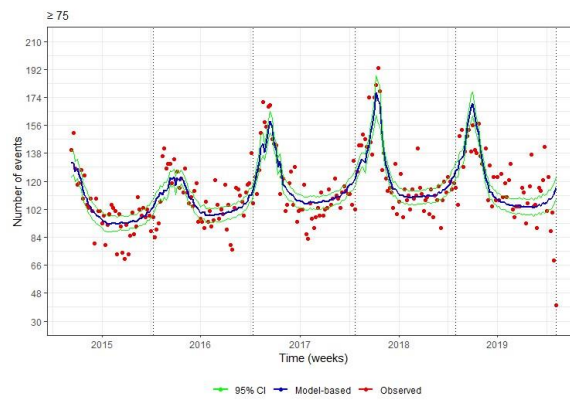

Supplement: 40121_2024_951_MOESM1_ESM.pdf [file 40121_2024_951_MOESM1_ESM.pdf]
